# Supplementary material
Source: PubMed Central journal article supplement (PMC3961682)
Supplement: supp_M113.537456_jbc.M113.537456-1.pdf [file supp_M113.537456_jbc.M113.537456-1.pdf]

## **Supplemental information**

### **A Novel Structural Unit in the N-Terminal Region of Filamins**

**Ritika Sethi, Jonne Seppälä, Helena Tossavainen, Mikko Ylilauri, Salla Ruskamo, Olli T. Pentikäinen, Ulla Pentikäinen, Perttu Permi, and Jari Ylänne**

## **Inventory of Supplemental information**

**Figure S1. Residue conservation in FLN 3-5 (Related to Figure 3).**

**Figure S2. Overlay of the  $^1\text{H}$ -  $^{15}\text{N}$  HSQC spectra of FLNc5 (red) with FLNc4-5 (blue). Related to Figure 4C.**

**Figure S3.  $^1\text{H}$ -  $^{15}\text{N}$  HSQC spectra overlay: (A) FLNa3-5 + GPIb peptide; and (B) FLNc4-5 + GPIb peptide (Related to Figure 6G and H).**

**Figure S1. Residue conservation in FLN 3-5. Related to Figure 3.**

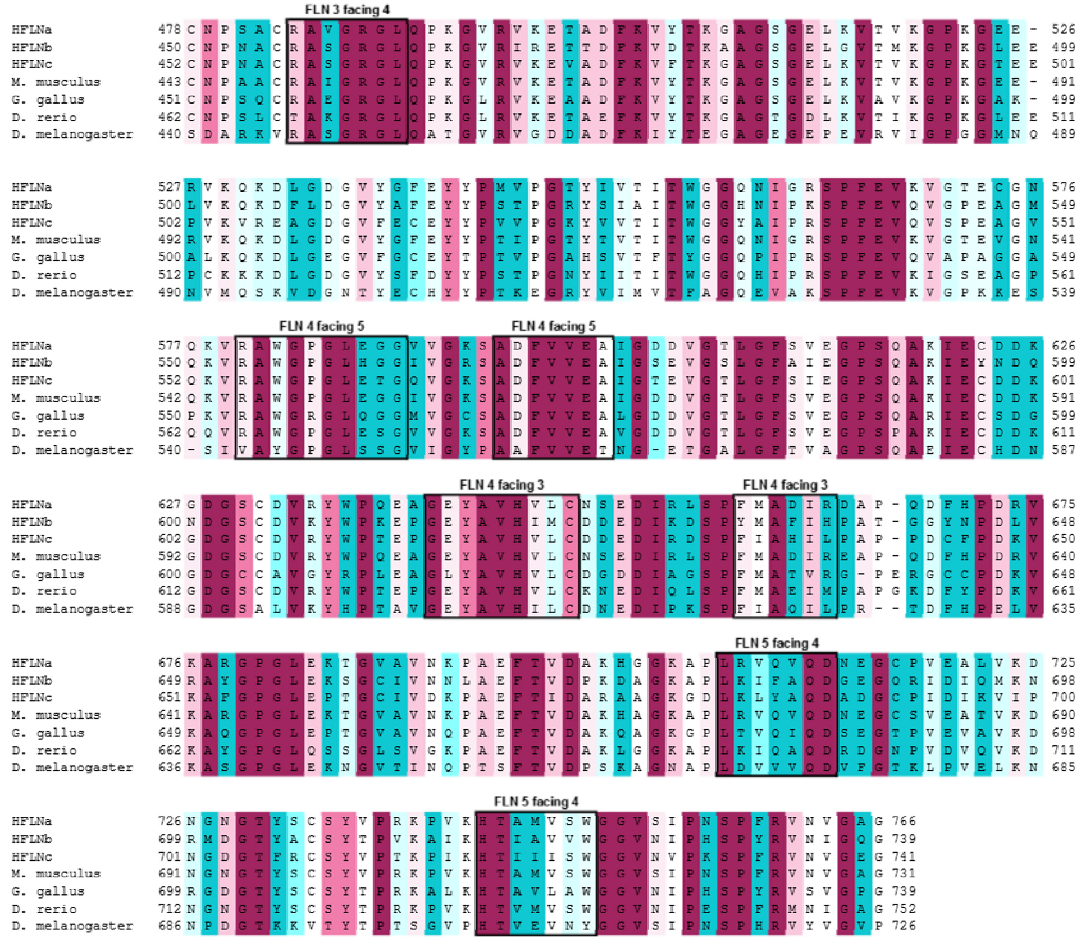

Sequence alignment with the same color code as Figure 3 is shown with the interfaces highlighted with a black box

**Figure S2.** Overlay of the  $^1\text{H}$ - $^{15}\text{N}$  HSQC spectra of FLNc5 (red) with FLNc4-5 (blue). Related to Figure 4C.

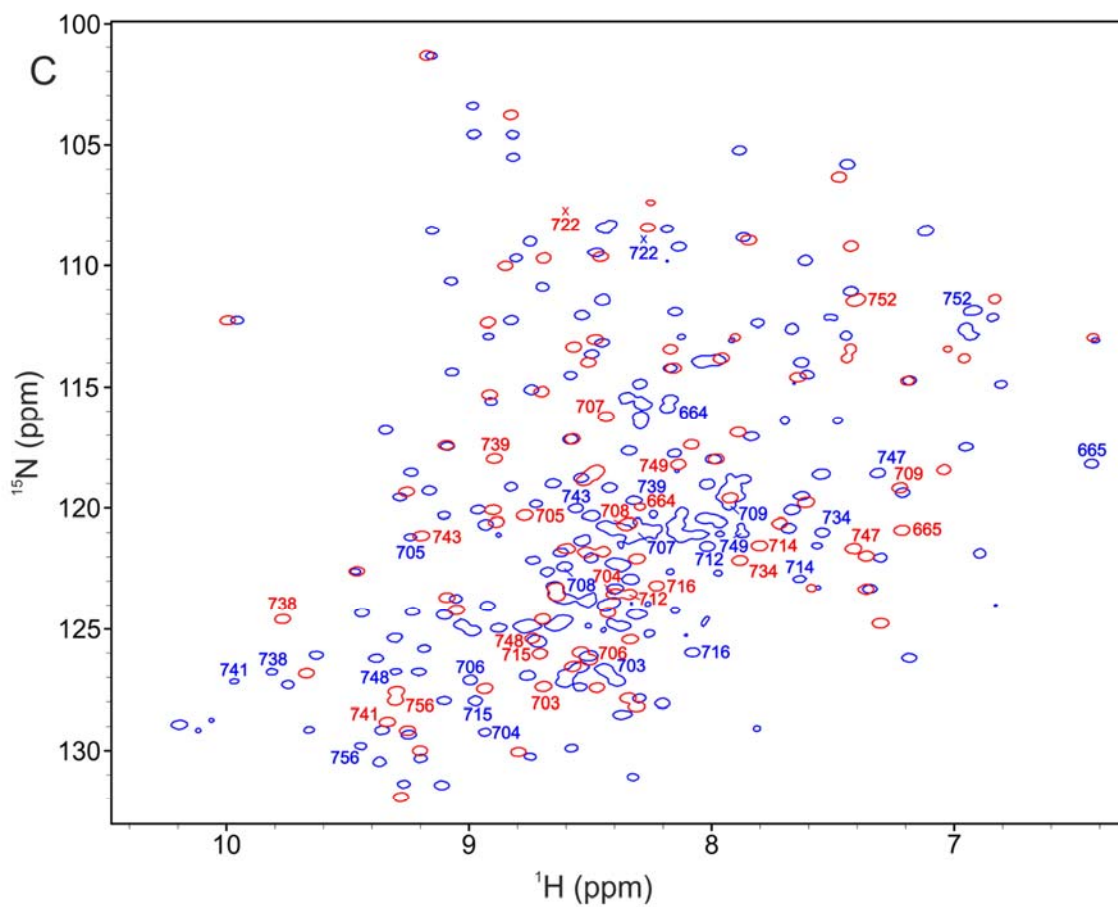

The residues shown in blue in Figure 4C are labeled here. The peaks of residue 722 are visible at a lower contour level and their positions are marked with crosses.

**Figure S3.**  $^1\text{H}$ - $^{15}\text{N}$  HSQC spectra overlay: (A) FLNa3-5 + GPIb peptide; and (B) FLNc4-5 + GPIb peptide (Related to Figure 6G and H)

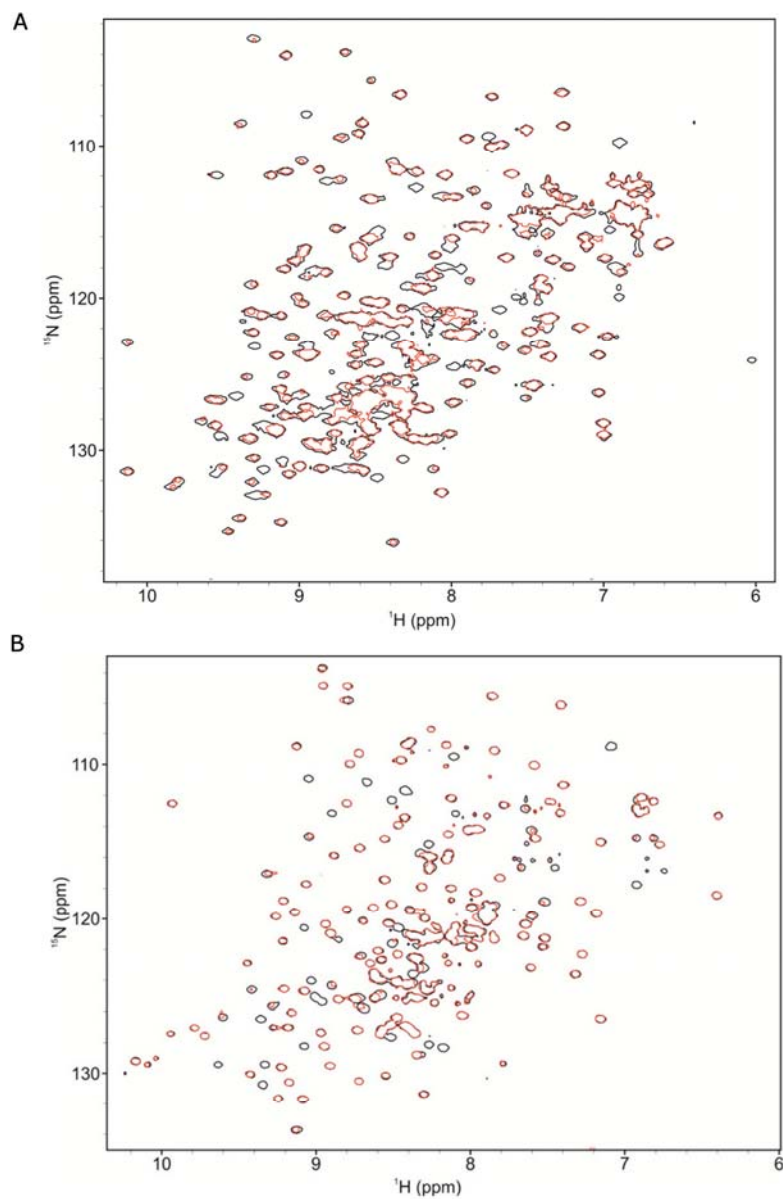

The black peaks represent the  $^{15}\text{N}$  HSQC spectrum of the protein alone. Overlaid with this is the 1:1 protein:peptide  $^{15}\text{N}$  HSQC spectrum represented with red peaks.
